# Supplementary material
Source: publisher figshare collection journal article supplement (https://acs.figshare.com/ndownloader/files/4680865)
Supplement: Supplementary file 1 [file 4680865]

The supporting material includes the DSC non-crystallization curves and WAXD patterns of PCLnPEO113 in the bulk and electron diffraction pattern of PCL40PEO44 micelles. The DSC non-crystallization curves and WAXD patterns of PCLnPEO44 in the bulk can be found in ref.[46] (Du, Z. X.; Xu, J. T.; Yang, Y.; Fan, Z. Q. *J Appl Polym Sci* **2007,** *105*, 771.). The DSC curves of WAXD patterns of PCLnPEO44 and PCLnPEO113 in the bulk show that both PCL and PEG blocks are crystallizable.

The hydrodynamic diameter and size distribution of the micelles were determined by dynamic light scattering (DLS) using a Brookhaven 90 Plus particle size analyzer. Each analysis lasted for 3 min and was performed at 25 °C with a detection angle of 90°. All micelle solutions had a final polymer concentration of about 0.1 mg/mL. Prior to the light scattering measurements, the solutions were filtered through 0.45 m filters firstly. The size of micelles is calculated from DLS data according to ref.42.

**Figure S1.** Non-isothermal crystallization DSC traces of PCLnPEO113 diblock copolymers in the bulk. The cooling rate is 10 C/min.

F**igure S2.** WAXD patterns of PCLnPEO 113 diblock copolymers in the bulk.

(a) PCL24PEO44 (b) PCL40PEO44

(c) PCL59PEO44 (d) PCL90PEO44

(e) PCL142PEO44

**Figure S3**. Particle size distributions of PCLnPEO44 micelles. (a) PCL24PEO44, (b) PCL40PEO44, (c) PCL59PEO44, (d) PCL90PEO44, (e) PCL142PEO44.

(a) PCL21PEO113 (b) PCL35PEO113

(c) PCL58PEO113 (d) PCL97PEO113

(e) PCL147PEO113 (f) PCL223PEO113

**Figure S4.** Particle size distributions of PCLnPEO113 micelles. (a) PCL21PEO113, (b) PCL35PEO113,(c) PCL58PEO113, (d) PCL97PEO113, (e) PCL147PEO113 (f) PCL232PEO113.
